# Supplementary material
Source: HighWire-hosted journal article supplement (https://erj.ersjournals.com/content/53/2/1800081)
Supplement: inline-supplementary-material-1 [file inline-supplementary-material-1.pdf]

## Supplementary

### Supplementary table S1

Comparison of baseline characteristics between survivors and non-survivors

| Characteristics                   | Non-survivors<br>(n = 42) | Survivors<br>(n = 240) | <i>P</i> value |
|-----------------------------------|---------------------------|------------------------|----------------|
| Age at recruitment, yr            | 36.2 ± 12.0               | 34.9 ± 10.0            | 0.439          |
| Female sex, %                     | 100.0                     | 99.2                   | 1.000          |
| Lupus duration, yr                | 3.3 ± 4.3                 | 4.5 ± 5.5              | 0.176          |
| <b>Clinical features</b>          |                           |                        |                |
| WHO FC I-II, %                    | 29.7                      | 53.8                   | 0.007**        |
| 6MWD, m                           | 347.1 ± 81.3              | 414.4 ± 98.2           | 0.001**        |
| Raynaud's phenomenon, %           | 59.5                      | 50.4                   | 0.276          |
| Acute rash, %                     | 35.7                      | 32.9                   | 0.723          |
| Serositis, %                      | 40.5                      | 36.3                   | 0.600          |
| Lupus nephritis, %                | 38.1                      | 34.6                   | 0.660          |
| Neuropsychiatric lupus, %         | 2.4                       | 4.2                    | 0.905          |
| Thrombocytopenia, %               | 40.5                      | 46.3                   | 0.488          |
| Hypocomplementemia, %             | 59.5                      | 64.2                   | 0.564          |
| Anti-dsDNA, %                     | 35.7                      | 35.3                   | 0.961          |
| Anti-Sm,%                         | 31.0                      | 36.7                   | 0.476          |
| Anti-U1 RNP, %                    | 69.0                      | 59.4                   | 0.238          |
| APL, %                            | 12.8                      | 13.1                   | 0.961          |
| SLEDAI                            | 5.2 ± 3.8                 | 6.5 ± 5.9              | 0.067          |
| <b>RHC</b>                        |                           |                        |                |
| mPAP, mmHg                        | 52.6 ± 11.8               | 45.4 ± 11.9            | 0.001**        |
| PVR, WU                           | 13.9 ± 5.8                | 10.4 ± 5.2             | 0.001**        |
| CI < 2.5 L/min×m <sup>2</sup> , % | 64.9                      | 38.0                   | 0.003**        |
| RAP mmHg, %                       | 5.9 ± 4.5                 | 5.6 ± 5.8              | 0.849          |
| <b>Treatment</b>                  |                           |                        |                |
| Glucocorticoids                   | 100.0                     | 99.2                   | 1.000          |

|                          |      |      |       |
|--------------------------|------|------|-------|
| Immunosuppressants       | 95.2 | 92.5 | 0.524 |
| PAH-targeted medications | 76.2 | 69.2 | 0.358 |

WHO FC = WHO functional class, 6MWD = 6-minute walking distance, APL = antiphospholipid, SLEDAI = systemic lupus erythematosus disease activity index, RHC = right heart catheterization, mPAP = mean pulmonary arterial pressure, PVR = pulmonary vascular resistance, CI = cardiac index, RAP = right atrial pressure

## Supplementary table S2

Comparison of baseline characteristics between patients who achieved or did not achieve their treatment goals

| Characteristics           | Achieved<br>treatment goal<br>(n = 115) | Did not achieve<br>treatment goal<br>(n = 148) | <i>P</i> value |
|---------------------------|-----------------------------------------|------------------------------------------------|----------------|
| Age at recruitment, yr    | 34.7 ± 9.6                              | 35.2 ± 10.8                                    | 0.676          |
| Female sex, %             | 99.1                                    | 99.3                                           | 1.000          |
| Lupus duration, yr        | 4.9 ± 5.8                               | 3.7 ± 4.6                                      | 0.082          |
| <b>Clinical features</b>  |                                         |                                                |                |
| WHO FC I-II, %            | 53.6                                    | 45.5                                           | 0.217          |
| 6MWD, m                   | 428.2 ± 93.0                            | 376.0 ± 99.4                                   | < 0.001**      |
| Raynaud's phenomenon, %   | 56.5                                    | 47.3                                           | 0.138          |
| Acute rash, %             | 33.0                                    | 33.1                                           | 0.991          |
| Serositis, %              | 46.1                                    | 31.1                                           | 0.013*         |
| Lupus nephritis, %        | 40.9                                    | 33.1                                           | 0.195          |
| Neuropsychiatric lupus, % | 6.1                                     | 2.7                                            | 0.174          |
| Thrombocytopenia, %       | 53.0                                    | 43.9                                           | 0.142          |
| Hypocomplementemia, %     | 70.4                                    | 60.1                                           | 0.083          |
| Anti-dsDNA, %             | 37.2                                    | 31.7                                           | 0.360          |
| Anti-Sm,%                 | 36.5                                    | 35.1                                           | 0.816          |
| Anti-U1 RNP, %            | 67.0                                    | 56.9                                           | 0.105          |

|                                   |             |             |           |
|-----------------------------------|-------------|-------------|-----------|
| APL, %                            | 13.1        | 13.0        | 0.973     |
| SLEDAI                            | 6.5 ± 6.7   | 6.0 ± 4.8   | 0.484     |
| <b>RHC</b>                        |             |             |           |
| mPAP, mmHg                        | 43.7 ± 11.3 | 49.5 ± 12.6 | < 0.001** |
| PVR, WU                           | 9.7 ± 4.3   | 12.5 ± 6.0  | < 0.001** |
| CI < 2.5 L/min×m <sup>2</sup> , % | 27.8        | 55.5        | 0.001**   |
| RAP, mmHg                         | 5.0 ± 6.3   | 6.2 ± 5.0   | 0.182     |
| <b>Treatment</b>                  |             |             |           |
| Glucocorticoids                   | 99.1        | 99.3        | 1.000     |
| Immunosuppressants                | 92.2        | 92.6        | 0.905     |
| PAH-targeted medications          | 60.0        | 77.0        | 0.003**   |

WHO FC = WHO functional class, 6MWD = 6-minute walking distance, APL = antiphospholipid, SLEDAI = systemic lupus erythematosus disease activity index, RHC = right heart catheterization, mPAP = mean pulmonary arterial pressure, PVR = pulmonary vascular resistance, CI = cardiac index, RAP = right atrial pressure

Supplementary table S3

Baseline characteristics between intensive immunosuppressant (IST) group and the HCQ only group stratified by baseline serositis

|                          | Baseline serositis |        |       | Without baseline serositis |          |       |
|--------------------------|--------------------|--------|-------|----------------------------|----------|-------|
|                          | IST                | HCQ    | P     | IST                        | HCQ only | P     |
|                          | n = 64             | only   | value | n = 113                    | n = 31   | value |
|                          | n = 20             |        |       |                            |          |       |
| Age at recruitment, yr   | 33.4 ±             | 35.7 ± | 0.292 | 35.8 ±                     | 36.1 ±   | 0.874 |
|                          | 8.2                | 9.6    |       | 10.4                       | 12.8     |       |
| Female sex, %            | 100                | 100    | -     | 98.2                       | 100      | 0.456 |
| WHO FC I-II, %           | 43.5               | 42.1   | 0.912 | 53.8                       | 65.4     | 0.295 |
| 6 MWD > 380 m, %         | 59.6               | 42.9   | 0.400 | 76.1                       | 59.1     | 0.121 |
| CI ≥ 2.5                 | 35.9               | 60.0   | 0.057 | 35.5                       | 48.4     | 0.191 |
| L/min×m <sup>2</sup> , % |                    |        |       |                            |          |       |

WHO FC = WHO functional class, 6MWD = 6-minute walking distance, CI = cardiac index
